# Supplementary material for: The Relative Contribution of Immigration or Local Increase for Persistence of Urban Schistosomiasis in Salvador, Bahia, Brazil
Source: PLoS Negl Trop Dis. 2015 Mar 16;9(3):e0003521. doi: 10.1371/journal.pntd.0003521 (PMC4361398; doi:10.1371/journal.pntd.0003521)
Supplement: S1 Dataset — (XLSX) [file pntd.0003521.s001.xlsx]

## Sheet: SB Allele Frequencies
Infrapopulation allele frequencies São Bartolomeu, Salvador, Bahia, Brazil 2011
Individuals with >12 markers amplifying
IDNO - Identification number
Left column shows microsatellite allele sizes (number of nucleotides)
IDNO	Total	1	18	30	33	40	46	47	93	94	110	125	126	128	139	147	151	153	157	187	206	211	249	259	261	262	264	268	279	282	294	298	314	317	318	332	333	352	353	354	374	412	415	429	439	459	473	478	479
SMMS2
211.499	1647	0	0	0	0	123	0	0	0	19	0	4	0	0	0	0	0		0	0	16	0	4	64	58	183	219	33	6	0	0	0	19	345	0	16	0	0	86	0	2	168	0	39	0	192	0	0	0
215.407	2389518	969	2531	827	19384	10411	1285	5965	2939	2373	474	350	4074	1731	8762	1496	2244		7217	1940	904	11797	367	6852	7548	15526	61363	2514	1744	384	2198	282	2080	34893	353	4552	368	1354	28856	246	7284	17024	99276	31221	3054	37071	24717	10438	10711
219.362	2149	0	0	0	0	0	0	0	0	0	0	0	0	0	0	0	0		0	0	0	0	0	0	0	0	0	0	0	0	0	0	0	0	0	0	0	0	0	0	0	0	0	0	0	0	0	0	0
234.737	836126	375	1021	173	5672	5378	611	2963	1093	884	150	147	1410	1389	3286	376	708		1555	1084	244	5303	128	2595	1970	6402	17404	1149	554	0	826	102	614	12450	125	1648	132	266	8321	90	2457	5992	31020	11132	1194	13809	8883	4309	3818
SMMS3
172.991	1168	0	0	0	0	0	0	0	0	0	0	0	0	0	0	0	0	0	0	0	0	0	0	0	0	0	0	0	0	0	0	0	0	67	1	0	0	0	0	0	0	149	0	0	0	346	0	0	0
175.973	39221	0	0	0	142	0	0	0	74	36	5	12	98	0	133	0	42	43	272	0	53	125	11	178	173	134	686	82	0	0	0	0	0	388	8	0	0	0	586	6	0	382	0	100	139	502	294	17	393
178.96	46855	19	25	0	758	0	0	196	75	46	6	0	90	0	153	43	40	38	198	44	32	304	10	111	207	365	1513	31	6	0	61	4	10	1086	2	142	0	33	786	10	14	315	0	114	39	1077	344	14	0
181.978	527760	239	558	145	4988	1568	266	3033	548	606	63	73	1148	176	2036	224	452	155	1388	515	98	3058	67	1880	1280	3128	9059	613	346	89	288	63	460	5388	60	2281	71	1120	10838	53	2991	3269	27948	6769	776	8038	5197	2378	2553
185.005	823317	314	1062	194	8398	4293	460	2732	1673	642	153	86	1386	977	2853	515	660	269	2382	740	300	4504	111	3212	2028	5489	22319	853	582	148	841	96	537	11620	113	2650	151	957	13760	59	592	5483	34352	10817	1155	13084	8419	3191	3882
188.035	430266	214	591	196	4775	2403	351	711	411	454	88	20	795	172	1519	219	384	186	1271	583	117	2259	83	978	1155	3161	12304	576	320	9	489	46	251	7270	74	2005	81	48	6480	48	716	2910	8467	4375	631	7397	4405	1950	1979
191.055	426237	230	608	155	4765	1348	217	572	501	424	76	136	548	917	1584	317	403	114	1230	288	266	2247	73	1366	1225	2768	7903	402	368	64	411	49	528	6580	58	1697	38	301	7348	38	2080	3249	18127	7280	517	6541	4541	2358	1680
194.077	401532	116	134	45	3466	1601	421	544	364	394	79	79	428	377	1342	209	342	62	702	457	146	1918	72	1432	1190	2882	7680	526	330	26	479	45	344	6571	56	1221	70	223	6488	52	1506	3180	19202	4759	419	4684	4127	2121	1829
197.102	328486	105	280	162	3248	2899	109	560	194	410	90	38	542	339	1253	139	355	75	725	300	116	1357	36	1362	1219	1953	8935	270	178	40	238	44	158	4289	57	1117	63	157	4236	44	1181	2058	12706	5037	319	5060	3274	1925	1501
200.118	203956	77	193	104	1738	1147	72	440	192	256	42	35	296	162	917	141	223	39	428	73	22	1067	35	864	785	1590	7610	233	149	8	197	28	256	3615	37	535	26	233	3288	27	666	1592	7879	2844	254	3335	2451	756	712
203.077	54657	30	102	0	120	654	0	138	0	8	20	14	148	0	257	67	34	10	106	0	14	187	3	254	194	437	866	110	26	0	22	7	132	620	9	159	0	0	983	0	0	429	1614	279	0	629	549	27	0
206.029	10870	0	0	0	96	0	0	0	0	0	0	8	4	0	0	0	10	7	70	0	1	74	0	52	120	205	111	0	0	0	0	2	38	193	1	0	0	0	530	0	0	169	0	18	0	379	0	8	0
209.025	465	0	0	0	0	0	0	0	0	0	0	0	0	0	0	0	6	0	0	25	0	0	0	0	0	0	0	0	0	0	0	0	0	0	0	0	0	0	0	0	0	0	0	0	0	0	0	0	0
SMMS13
179.643	7986	0	0	0	177	0	0	0	0	0	0	0	0	0	0	0	0	0	0	0	0	0	0	128	36	164	214	0	0	0	0	0	0	79	0	0	0	0	0		0	90	0	0	0	297	0	0	0
182.641	384508	147	124	102	1776	1320	145	1225	353	338	53	41	478	320	2112	296	389	81	162	102	136	1154	81	1540	1531	2888	14517	32	552	50	0	50	574	5204	56	1605	0	50	6613		24	2860	17301	5594	720	5164	4199	2094	1961
185.642	2705808	1108	3428	830	29813	13061	1617	7703	3528	2730	524	442	4650	2701	12130	1576	2361	833	8484	379	980	14914	401	9403	7282	17886	59193	3664	3184	290	3024	314	4459	39245	408	9915	500	1570	47118		9714	19041	97317	36388	3369	42725	28056	12626	11312
188.678	161081	90	0	0	598	1530	134	0	151	208	38	17	346	99	749	0	168	86	126	19	48	813	18	618	594	1112	3391	0	200	44	0	19	295	2731	12	287	0	0	1590		6	1134	15679	359	159	2886	1345	27	1130
191.677	14959	0	0	68	132	0	0	0	0	0	10	0	10	0	154	0	34	0	0	0	0	219	0	0	134	63	1672	0	0	0	0	0	0	428	2	0	0	0	0		0	60	0	51	0	0	0	0	125
SMMS16
210.859	30072	5	14	0	122	127	0	25	33	30	1	21	16	11	77	54	26	3	33	16	30	109	3	122	108	411	627	27	6	0	0	2	0	472	6	31	0	1	204	0	4	331	7417	67	0	668	168	6	58
213.879	1183676	641	1304	252	13055	6224	861	3843	1389	1182	192	201	1868	1540	3938	803	993	430	3478	1820	472	5080	192	2823	3159	7479	25196	1454	1086	140	1068	125	643	16685	200	2098	179	590	14597	164	5544	8238	47253	21260	1447	18695	11394	5132	5458
216.978	850715	217	886	293	7278	2454	412	1039	832	938	174	69	1176	800	3129	366	749	267	2274	274	257	4829	93	1910	2361	5205	17516	782	582	130	708	116	568	12986	120	1936	161	667	9409	93	1469	5909	29758	9661	1116	13970	9854	3453	3346
220.099	445729	98	517	212	4844	2701	184	906	867	474	117	79	1136	183	1714	153	448	118	1116	517	131	2856	69	1468	1313	3463	14395	416	218	47	370	49	231	6402	48	922	66	156	4979	25	1121	3158	17376	4454	671	6981	4284	1918	1992
223.153	482077	265	626	75	4850	2381	246	1958	526	412	86	79	714	429	2163	326	468	120	1284	241	188	2614	104	1054	1518	3508	13120	570	290	64	545	65	277	7236	54	700	53	73	5257	34	1596	3087	14479	4467	654	6749	5510	2859	2370
226.179	290275	118	204	168	2348	2024	193	1157	384	239	53	51	552	157	1013	164	269	62	588	156	86	1612	39	2135	1116	2046	8130	447	122	4	306	29	67	3863	48	530	41	132	2758	19	0	2427	14013	2484	359	4009	2391	1379	1305
229.284	1148	0	0	0	0	0	0	0	0	0	0	0	22	0	13	5	0	0	0	0	0	0	0	0	0	0	0	0	0	0	27	0	29	45	0	0	0	0	61	0	10	34	0	0	0	0	0	0	0
SMMS17
286.007	21	0			0	0		0			0		0		0		0	0	0		0	0	0	0	0	0	0		0		0	0	0	0	0	0		0	0		0	0	0	0		0	0	0	0
289.057	96719	207			1253	0		0			15		520		616		125	18	340		136	1032	0	822	568	891	1826		0		0	16	0	1889	0	371		0	0		0	1036	0	0		927	1411	100	0
292.023	1545955	1809			12755	12041		234			323		3335		8101		1362	532	4248		612	8471	237	7278	5058	10208	18206		2160		1382	197	3009	25160	238	6844		1919	40448		1002	11214	130296	13920		26655	17633	892	1459
294.995	941591	996			8743	2314		238			217		2100		4557		1154	364	3392		394	6131	200	5841	3967	8020	13756		1607		1328	126	1390	15745	200	3244		1153	25203		726	8255	0	9673		18881	11461	724	7007
297.962	270318	348			2123	1557		29			69		741		1652		265	85	691		22	1466	63	1516	1207	2993	5092		169		314	38	929	4681	62	1349		0	8269		0	2468	0	3311		4609	3096	194	0
300.908	10172	0			181	0		0			0		0		218		45	0	102		0	0	0	0	0	0	0		0		0	7	0	213	0	0		0	0		0	210	0	0		0	0	15	0
SMMS18
191.076	2012	0	0	0	0	0	0	0	0	0	0	0	0	0	0	0	0	0	0	0	0	0	0	0	0	0	0	0	0	0	0	3	0	0	0	0	0	0	0	0	0	0	0	0	0	0	0	0	0
194.813	502886	163	271	20	7824	1985	216	2215	507	640	93	65	736	467	1819	449	421	162	1380	598	222	2034	98	1840	932	4361	13113	572	334	0	737	48	339	6316	84	956	72	283	5222	72	3	3797	19965	7548	798	6798	4217	3838	2348
197.448	6147	0	0	0	0	0	0	0	0	0	0	0	0	0	0	0	0	0	0	0	0	0	0	0	0	0	0	0	41	0	0	3	0	195	0	0	0	0	0	0	0	143	0	0	0	195	0	0	0
200.582	6253	0	0	0	0	0	0	0	0	0	0	0	0	0	0	0	0	0	0	0	0	0	0	0	0	0	0	0	0	2	0	0	0	578	1	20	0	0	87	0	94	195	0	63	0	389	0	0	0
203.779	1108256	396	1480	413	11217	5316	903	2581	1764	1162	241	240	2156	705	3750	613	947	346	2800	1272	421	6147	207	4534	3272	8888	25241	1508	541	214	1008	132	598	16222	154	2081	214	687	11739	106	5756	7676	44621	15784	1424	17020	11222	5375	5548
206.746	113732	51	0	0	390	350	49	0	49	78	15	16	201	14	438	59	127	33	379	0	134	831	4	376	1764	871	2764	260	31	3	33	11	303	1451	13	154	0	64	1487	0	12	826	6258	1562	106	2049	997	42	482
209.712	643804	302	686	205	7172	2734	332	1848	988	568	79	52	1154	724	2580	298	643	214	1888	428	182	3566	109	2594	1839	3482	19836	571	575	116	755	79	665	10073	106	1582	107	222	7374	67	804	4744	27727	8440	887	9507	6921	2698	3284
212.685	630289	361	502	235	5330	4830	270	1633	640	634	172	101	986	850	2526	314	663	217	1814	529	160	3534	67	1800	1454	3652	16043	667	697	12	391	82	680	9970	102	1102	98	179	7179	72	1213	4718	27201	7039	953	10876	8032	2729	2560
215.694	96683	21	251	75	428	432	85	339	53	192	23	12	180	205	358	63	104	28	325	99	40	743	5	504	310	620	1869	114	69	36	42	13	10	1852	13	168	10	88	933	19	0	723	4523	338	79	1144	1095	39	308
218.717	3418	23	124	0	0	0	0	0	0	0	0	0	11	0	16	0	0	0	48	0	0	0	0	40	0	78	18	2	16	0	0	1	0	260	0	0	0	0	0	0	0	65	0	0	0	509	101	10	0
221.736	13889	26	0	52	136	265	41	312	0	2	0	14	7	0	175	0	22	0	90	99	4	245	10	0	4	161	103	0	0	0	57	8	24	111	0	152	0	0	339	0	0	222	0	0	0	0	535	13	0
224.724	169	0	0	0	0	0	0	0	10	0	0	0	0	155	0	0	0	0	0	0	0	0	0	0	0	0	0	0	0	0	0	0	0	0	0	0	0	0	0	0	0	0	0	0	0	0	0	4	0
227.746	100	0	56	0	0	0	0	0	21	0	0	0	0	0	23	0	0	0	0	0	0	0	0	0	0	0	0	0	0	0	0	0	0	0	0	0	0	0	0	0	0	0	0	0	0	0	0	0	0
233.615	20805	0	181	0	0	0	0	0	0	0	0	0	54	0	361	76	25	0	48	0	0	0	0	0	0	0	0	0	0	0	0	5	92	659	4	0	0	98	2903	0	1863	76	0	1617	0	2585	480	0	0
SMMS21
172.141	7938	0	0	31	0	0	12	0	9	0	8	0	0	0	88	0	5	14	62	0	0	0	0	0	0	0	0	0	0	0	0	0	0	0	0	0	0	0	0		0	0	0	0	0	0	62	0	0
175.16	88214	31	162	65	404	618	42	459	136	108	16	18	139	202	520	42	78	18	261	111	24	438	29	390	359	823	3401	168	308	0	160	0	48	1273	14	405	0	0	2084		114	752	0	194	0	1356	1077	30	356
178.217	2345531	1030	2486	607	24284	11628	1279	7975	2789	2204	415	346	3554	2121	7942	1309	2069	746	6300	1965	892	12031	363	8037	6877	14854	55488	2409	2892	350	2320	221	2114	34524	360	7982	368	2004	38158		7315	16362	98445	31873	3165	35343	23061	1200	10676
181.305	800778	263	904	297	7632	3666	564	494	987	844	172	123	1790	798	3353	504	754	210	2028	860	242	4550	99	2908	2154	6192	17895	1119	736	34	498	83	520	11043	98	3325	132	1068	14637		2314	5685	31851	10207	1083	13363	8960	694	3496
184.421	36362	20	0	0	176	0	0	0	110	120	13	13	0	0	145	16	45	12	120	89	7	81	9	353	187	243	2202	0	0	0	47	0	30	849	6	96	0	0	441		0	386	0	118	0	1009	440	0	0
203.713	11353	0	0	0	0	0	0	0	0	0	0	0	0	0	0	0	0	0	0	0	0	0	0	0	0	0	0	0	0	0	0	37	0	0	0	0	0	0	0		0	0	0	0	0	0	0	0	0
209.649	6274	0	0	0	0	0	0	0	0	0	0	0	0	0	0	0	0	0	0	0	0	0	0	0	0	0	0	0	0	0	0	21	0	0	0	0	0	0	0		0	0	0	0	0	0	0	0	0
212.617	6050	0	0	0	0	0	0	0	0	0	0	0	0	0	0	0	0	0	0	0	0	0	0	0	0	0	0	0	0	0	0	22	0	0	0	0	0	0	0		0	0	0	0	0	0	0	0	0
SM13-410
191.809	6876	0		0	0	183	0	0	0	29	0	3	37	0	98	0	0	0	28	0	0	0	0	42	32	146	184	0	0	6	0	3	0	155	0	0	0	0	244	0	72	218	0	0	0	492	0	0	0
194.857	677171	247		63	6118	3009	339	2398	670	607	142	161	1036	286	3040	371	602	201	1840	285	110	2548	134	2144	1789	4241	16523	698	243	170	1006	67	346	10689	106	1085	73	385	8821	36	2940	4856	21731	10318	1510	13119	6099	4966	3336
197.82	102879	68		35	0	660	0	205	179	143	22	15	201	113	544	71	109	28	228	114	38	484	18	495	340	703	1811	142	50	11	103	14	71	1852	20	276	23	56	1416	8	290	960	5769	1624	143	2035	1132	27	189
200.85	2074722	841		352	22136	10474	1249	6060	2910	2060	395	279	3670	1779	9377	1203	1891	690	5542	2626	828	10789	302	7590	6196	13194	50903	2190	1817	197	1593	246	1258	28827	298	4028	338	1038	22489	121	4930	14159	83260	23980	1871	29405	21395	7117	9348
203.87	434083	188		50	4243	1585	308	265	273	438	65	41	540	942	2084	227	350	81	1135	0	188	3279	46	1416	1220	3827	9566	666	313	0	322	55	142	6165	54	827	65	140	4295	19	1512	2991	19536	6470	725	6021	4974	2636	1657
206.597	1006	0		0	0	0	0	0	0	0	0	0	0	0	0	0	0	0	0	0	0	0	0	0	0	0	0	0	0	0	0	0	0	0	0	0	0	0	0	153	0	0	0	0	0	0	0	0	0
13TAGA
98.0729	83	0	0	0	0	0	0	0	0	0	0	0	0	0	0	0	0	0	0	0	0	0	0	0	0	0	0	0	0	0	0	0	0	0	0	0	0	0	0	0	0	0	0	0	0	0	0	0	0
102.128	60844	19	59	0	491	143	41	135	62	34	8	7	74	44	176	29	48	13	90	50	16	230	4	225	195	674	1450	58	44	3	33	6	23	720	8	70	7	32	420	6	194	405	3508	1063	169	1315	496	357	90
106.308	1515689	553	1942	559	14872	5177	745	4353	1705	1075	258	265	2315	1652	5476	1025	1289	470	3990	2018	544	7975	194	5127	4600	10046	34554	1510	955	101	1106	169	820	22599	204	2800	244	616	15707	145	7722	10753	46082	18189	1717	21391	14956	6381	6422
110.483	498096	220	184	95	4412	3180	311	740	675	686	111	87	796	82	1646	281	431	214	1436	262	192	2248	101	1891	1416	3310	12570	538	315	16	598	61	173	7045	70	1027	72	124	5927	48	312	3875	21577	7775	438	7848	5497	1417	2182
114.606	215875	101	497	109	2666	1403	239	160	160	210	36	17	482	188	898	62	203	64	698	99	75	1083	37	761	620	1302	5060	263	108	103	234	28	40	3172	32	426	39	130	3127	18	760	1464	10666	3546	507	3735	2519	971	1307
118.625	651883	294	434	188	6327	5032	364	2450	1130	892	135	67	1150	831	2494	311	613	158	1617	298	237	4217	98	1940	1637	3897	15267	828	626	54	458	71	534	8225	96	1284	95	531	7807	75	544	3945	31139	7575	824	10127	6420	3108	2750
122.618	194595	118	118	19	2190	485	152	773	171	258	33	34	315	21	748	102	202	35	498	296	33	869	35	910	673	1639	6022	326	104	8	407	27	104	3146	36	296	18	73	2430	20	0	1234	10018	1970	358	3998	2164	1249	1016
126.611	71768	20	234	31	760	395	44	30	54	64	9	2	290	204	235	19	67	16	157	0	44	172	13	414	176	624	1646	73	127	89	71	11	32	1022	16	104	6	32	795	7	0	691	4944	906	103	1447	778	529	322
130.615	74804	19	84	0	630	98	0	285	75	52	20	20	40	99	305	43	82	23	232	0	22	306	9	410	254	619	2318	80	137	10	63	7	79	1444	14	98	12	80	904	13	0	779	2362	1158	132	1209	627	623	439
134.637	10537	0	0	0	150	0	0	0	0	5	14	1	16	0	52	0	17	8	56	0	0	0	8	10	4	0	100	22	0	0	53	2	11	248	2	44	0	0	148	3	212	38	0	210	0	0	144	111	0
138.68	946	0	0	0	0	0	0	0	0	0	0	0	3	0	18	0	0	0	0	0	0	0	0	0	0	0	0	0	8	0	0	2	0	67	0	66	7	0	0	1	0	0	0	0	0	0	0	0	0
1F8A
150.317	27431	0			0	0		0	0	109	0	0	32	0	182	0	37	5	71		44	0	0	0	280	224	370	0	0	0		5	0	481	4	80	0		0	0	12	350	0	57		0	427	0
153.416	1289020	529			15626	6226		193	1436	1402	288	307	2388	667	5436	820	1175	420	3454		455	7338	276	4743	3633	7983	32225	436	1524	93		148	2403	20146	217	2738	118		21987	126	8429	8572	58869	18200		21171	13245	6138
156.533	475090	258			4394	1795		60	657	360	93	0	750	599	2086	284	469	169	1358		115	2670	61	1690	1552	2973	13493	108	643	83		54	569	8845	57	599	0		8498	54	18	3622	17973	6908		7585	4910	2735
159.646	560267	259			5568	3422		86	698	772	95	104	836	1104	2770	272	455	190	1650		204	3119	56	2018	1513	4389	13337	198	785	52		67	1382	8323	84	900	51		10630	73	272	4102	24416	6983		9099	5466	2880
162.712	701935	298			6042	3194		161	1093	632	121	89	1301	600	3686	423	659	195	1884		220	3338	107	2706	2106	5216	16158	123	932	46		89	974	8675	100	1222	55		12414	68	1014	5379	23762	8705		11560	7931	2929
165.785	120063	0			747	1275		0	148	0	28	0	163	150	700	72	117	21	255		92	635	0	400	296	1116	1635	0	52	16		17	0	1218	18	168	0		1790	14	0	954	5275	0		1657	1217	48
168.836	25677	0			92	0		0	0	0	0	0	14	0	180	0	24	0	94		35	0	0	0	167	112	1698	0	0	0		5	0	0	0	48	0		0	0	0	205	0	161		0	403	18
171.955	6694	0			26	0		0	0	0	0	0	0	0	106	0	15	0	6		0	0	0	131	29	99	70	0	0	94		0	0	0	0	460	276		0	0	0	0	0	1378		0	0	0
174.895	6474	0			0	0		0	0	0	0	0	0	0	0	0	0	0	0		0	0	0	0	0	0	0	0	0	0		0	0	0	0	0	0		0	0	0	0	0	0		0	0	0
SMDA23
192.118	804	0	0	0	0	0	0	0	0	0	0	0	0	0	0	0	0	0	0	0	0	0	0	0	0	0	0	0	0	0	0	0	0	0	0	0	0	0	0	0	0	0	0	0	0	0	0	0	0
196.195	76245	45	0	0	316	125	0	445	124	56	23	23	90	131	342	33	79	24	118	48	8	0	0	218	161	650	1316	70	140	0	0	10	277	1516	8	258	21	0	404	11	870	1007	3330	179	40	1317	867	59	318
200.33	1806686	721	1668	237	16779	7521	668	3384	2299	2226	322	206	2788	1761	7150	1045	1436	475	4679	1600	560	9032	254	6163	4971	10768	40323	1987	1658	212	1544	188	2632	25407	264	5009	236	1600	32692	160	3968	12438	66145	23919	2385	24586	16504	7913	10238
204.381	226900	108	246	0	2082	219	0	904	363	116	62	45	334	491	1230	75	217	101	663	0	108	2289	48	860	856	2187	3876	82	553	0	276	30	160	3683	28	947	43	0	4716	19	0	1752	9101	3491	224	2764	2447	1097	2059
208.419	118246	0	0	0	1516	150	175	392	68	20	25	19	270	42	524	78	97	26	218	116	44	0	7	456	301	1019	2566	66	59	0	46	15	139	1574	16	344	0	0	1243	18	0	926	4109	683	61	1890	1072	1669	89
212.484	291969	96	1252	45	3224	833	132	963	223	146	51	53	428	91	1945	159	362	105	717	480	80	1942	35	864	866	2016	7208	90	452	49	256	35	469	3494	56	1691	61	372	4504	40	0	1968	11996	4521	420	3546	3333	1005	832
216.619	215103	106	166	58	1798	2497	243	0	160	158	35	50	434	0	1182	87	279	73	690	457	144	2132	10	801	679	1874	8227	378	270	62	80	33	453	3509	32	1052	29	405	2172	25	1219	1463	11949	3644	228	3625	2323	71	124
220.758	234009	101	0	53	1692	2646	282	599	431	268	26	8	338	394	1459	170	212	82	749	144	116	1705	51	832	655	1622	7546	160	407	0	285	38	390	3297	24	1406	76	304	4498	29	221	1566	9094	1320	402	5119	2826	1589	334
224.811	111466	44	116	0	1186	523	94	599	196	10	15	38	279	63	572	120	88	40	374	32	41	0	9	337	454	716	3095	67	142	27	66	17	178	2069	22	387	33	0	2449	13	1640	763	6574	386	239	2852	1401	40	0
228.866	134404	52	102	60	3210	1397	143	808	139	132	24	31	312	106	455	51	106	47	387	98	54	0	5	611	405	703	2335	94	140	0	250	13	337	1042	16	445	0	0	1856	21	1688	953	4118	3949	249	2234	1273	1287	536
232.948	56808	18	0	46	694	0	158	836	29	104	24	14	142	40	284	54	78	18	104	50	8	0	0	184	149	375	1539	0	116	0	0	7	144	1260	8	269	0	0	787	0	0	280	3880	186	0	1205	861	16	0
236.941	49154	51	0	0	0	0	0	0	0	38	18	12	68	0	0	0	0	10	73	0	0	0	80	363	77	182	954	703	0	34	220	0	148	837	5	0	0	391	0	0	139	67	0	112	0	1934	694	0	0
15J15A
208.179	10953	0	0	0	368	0	66	0	0	8	2	0	12	0	3	22	19	7	38	0	1	59	2	0	66	122	62	0	0	0	0	1	0	655	0	0	0	0	236	0	0	87	0	0	0	403	301	239	75
211.139	63547	31	0	0	476	444	0	537	99	80	6	16	126	97	212	63	74	32	193	0	4	439	21	334	182	608	3797	5	291	0	80	7	8	1144	2	169	0	26	314	0	96	667	1393	1081	72	1339	774	279	354
214.16	568060	200	425	0	5552	4681	283	1398	828	862	102	177	962	477	2087	261	558	148	1462	295	115	3188	183	1652	1758	3685	15316	554	511	52	1289	71	230	7065	88	2225	140	352	6275	60	474	3973	19893	7528	628	8445	6136	1919	2944
217.216	1405431	600	1972	568	13458	5612	682	3425	1782	1216	321	140	2272	1129	5081	783	1196	400	3476	1603	465	7241	160	5602	5180	9725	30101	1894	1675	248	880	164	924	20175	199	4733	194	582	16264	134	5627	8693	54887	19666	1598	21785	14047	7458	5716
220.278	497134	151	584	181	4877	1500	487	666	587	387	72	83	952	698	1432	264	414	173	1442	378	320	2070	54	1672	1624	2991	8058	501	418	11	295	45	260	6364	72	1387	49	170	6397	51	2096	3546	25659	9142	518	7374	3885	1844	2140
223.273	248826	97	87	46	2580	1275	97	1303	275	244	29	23	294	246	1014	142	228	81	616	68	112	954	25	792	796	1545	6418	246	225	33	163	28	114	3642	52	864	46	104	2928	37	1046	1946	10850	7422	339	3448	2465	924	1124
226.253	454620	265	406	206	4563	2278	248	1599	461	410	73	61	798	383	1884	298	415	143	1401	565	122	2941	48	1436	1075	2899	14881	454	783	40	256	61	252	7467	64	2178	71	374	4479	54	405	3669	17614	9174	1092	6873	5406	1889	2126
229.257	42789	0	79	0	598	0	33	0	0	70	13	0	67	30	331	40	37	17	121	115	17	148	7	199	120	378	320	36	33	0	61	6	29	1176	0	253	0	11	372	0	0	604	0	0	0	1404	516	194	52
232.259	1073	0	0	0	23	124	0	0	0	0	6	0	0	60	5	0	11	0	24	0	7	60	0	0	0	159	33	0	0	0	0	0	0	0	0	0	0	0	0	0	0	0	0	0	0	0	70	0	0
235.565	6	0	0	0	0	0	0	0	0	0	0	0	0	0	0	0	0	0	0	0	0	0	0	0	0	0	0	6	0	0	0	0	0	0	0	0	0	0	0	0	0	0	0	0	0	0	0	0	0
29E6A
153.715	16042	0	0	0	0	1168	0	0	0	0	0	68	0	0	0	0	0	0	0	0	0	0	0	0	6	0	0	0	0	0	0	0	0	0	0	0	0	0	0	0	0	0	0	0	0	0	0	0	0
156.435	1979	0	0	0	146	0	0	0	0	0	0	0	0	0	0	0	0	0	0	0	0	0	0	0	0	0	0	0	0	0	0	0	0	0	0	0	0	0	0	0	0	0	0	0	0	0	0	0	0
159.444	223635	52	83	65	2164	1597	118	413	578	235	63	29	420	166	1057	78	191	98	757	323	29	1523	32	642	551	1583	5942	226	190	30	375	30	157	3379	34	1090	0	148	2321	396	140	1679	2994	1957	224	3438	2664	508	1033
162.436	1272821	493	2174	151	11966	5324	604	3062	1754	988	206	149	1875	2051	4642	757	1211	397	3282	1477	433	6396	164	4802	3556	8223	31200	1462	1802	174	1105	152	715	18598	160	4765	205	514	16076	634	4903	9033	16297	14883	1631	19983	13072	6025	5822
165.464	427301	164	571	155	4284	1572	385	1711	552	492	66	26	802	158	1176	252	332	92	926	122	175	1300	109	1206	2016	2399	7985	384	108	0	257	37	166	5897	56	1321	80	164	4042	17	61	3300	89601	6755	250	6681	3383	1618	1917
168.419	721347	431	0	376	7192	3359	496	2262	707	800	125	115	1176	705	2611	441	648	209	1661	657	306	4387	88	2962	1907	5695	17271	1164	654	108	602	88	433	10222	139	2421	108	452	8554	1078	1698	5211	10949	11529	1338	10519	7664	2310	2928
171.409	577205	179	724	253	6111	2381	294	1481	420	754	144	98	1078	11	2365	326	522	190	1954	424	194	3141	103	1844	1424	3852	13851	426	546	71	646	69	345	8440	73	1937	106	245	5677	252	2514	3565	9515	7268	679	9926	6066	4074	2640
174.401	60408	24	0	0	634	510	0	0	21	6	20	14	135	29	197	18	48	13	192	22	27	353	3	232	117	358	2737	32	0	0	39	8	0	1152	2	273	0	43	593	0	429	395	939	0	125	525	752	211	188
177.311	66	0	0	0	0	0	0	0	0	0	0	0	0	0	0	0	0	0	0	0	0	0	0	0	0	0	0	0	0	0	0	0	0	0	14	0	0	52	0	0	0	0	0	0	0	0	0	0	0
SM13-478
221.458	0	0	0	0	0	0	0	0	0	0	0	0	0	0	0	0	0	0	0	0	0	0	0	0	0	0	0	0	0	0	0	0	0	0	0	0	0	0	0	0	0	0	0	0	0	0	0	0	0
224.756	28653	7	0	34	138	0	0	0	56	39	2	4	84	0	0	13	29	13	84	0	0	0	4	493	47	87	198	88	20	5	64	4	96	716	4	46	0	24	245	6	34	512	1339	100	27	435	317	208	24
227.718	744222	312	599	0	10250	4413	220	1718	746	88	125	119	716	595	536	177	683	292	2070	16	326	5015	174	2646	1867	4087	17434	1144	789	130	756	88	574	12951	116	2307	144	530	10644	64	647	5188	33793	9551	1040	5832	7809	3865	3617
230.679	286983	67	270	0	2988	347	85	566	272	40	42	19	262	245	256	94	290	92	929	0	87	1712	45	1018	918	2682	11996	377	414	33	407	31	536	4685	34	1313	59	505	3280	36	70	1707	8994	3855	312	1583	3081	884	1141
233.653	744303	153	298	966	4008	1251	188	3448	467	2752	74	57	2666	287	10244	1298	321	134	1892	2974	162	1743	41	1744	1660	3332	8086	568	836	26	378	41	112	5178	133	1836	64	200	4527	67	8356	5201	44306	7098	336	27406	3746	1462	2295
236.633	844123	378	1318	0	9756	5730	735	1337	1367	144	176	118	867	1404	524	144	910	221	1778	28	320	4477	164	3380	2799	6262	21016	908	985	61	792	117	676	12115	112	3450	120	769	10075	102	2	6122	23532	13893	1312	8312	10076	4074	4142
239.625	472534	264	1066	0	4339	2349	668	1859	783	142	116	112	722	354	379	104	471	176	1304	6	204	3238	62	1603	1541	3609	12118	429	701	58	539	72	372	8523	64	2151	72	913	6450	47	467	3367	12822	7744	937	5307	6026	3568	2198
242.7	125287	93	0	0	585	376	0	0	170	18	45	36	130	235	99	42	137	48	509	0	63	914	6	530	360	1191	3737	172	140	66	52	20	344	2084	12	365	0	107	2044	15	0	778	4800	151	178	1397	1775	536	900
245.772	16247	27	0	0	124	0	0	0	105	54	27	0	0	0	4	0	27	11	64	0	0	0	0	0	41	76	79	6	32	6	0	3	0	746	0	245	41	24	0	0	0	47	711	0	42	351	236	145	64
248.814	10876	0	0	0	82	534	0	0	0	0	8	12	6	0	2	0	24	0	48	0	0	0	0	0	71	121	296	4	0	0	0	4	0	75	0	0	0	0	0	0	0	100	0	0	34	0	283	5	55
251.794	7754	16	0	0	161	376	0	0	19	0	5	5	33	0	4	0	29	11	96	0	0	0	0	140	10	414	327	0	19	0	0	4	0	491	0	93	0	0	0	0	168	101	0	0	30	345	252	0	56
254.772	5819	27	0	0	66	536	0	0	48	0	5	0	0	0	0	0	29	0	0	0	0	0	5	135	44	160	208	0	0	0	37	0	0	125	0	0	0	0	0	0	0	59	0	0	0	103	0	0	38
257.723	83	0	0	0	0	0	0	0	0	0	0	15	0	0	0	0	3	2	0	0	0	0	0	0	0	15	0	0	0	0	0	0	0	0	0	0	0	0	0	0	0	0	0	0	0	0	0	0	0
260.371	3786	0	0	0	0	0	0	0	0	0	0	3	0	0	0	0	0	0	0	0	0	0	0	0	217	76	3490	0	0	0	0	0	0	0	0	0	0	0	0	0	0	0	0	0	0	0	0	0	0
SMU31768
184.765	19889	64	626	470	0	0	1124	985	545	0	116	0	231	181	0	24	54	2	8	51	0	0	0	0	0	0	0	0	0	0	0	0	0	0	0	0	0	0	0	0	0	0	0	0	0	0	808	0	0
189.712	63250	27	40	14	382	240	0	0	107	74	9	20	108	84	271	46	68	20	164	52	20	245	9	252	205	415	1098	86	21	7	52	8	43	850	8	116	4	34	916	48	22	501	2052	1185	92	1455	623	212	364
192.82	192458	39	153	14	2171	1183	82	443	59	166	15	11	218	0	657	94	190	57	604	217	60	724	22	608	734	1080	3245	266	114	0	156	23	5	2935	38	445	48	0	2390	174	512	1394	7449	3053	56	2796	1867	1699	1144
195.931	66351	25	79	0	786	136	5	240	97	46	11	10	154	71	294	52	65	26	179	61	24	238	8	142	271	510	1886	83	50	11	60	9	43	1221	17	162	16	64	1108	7	128	880	2350	1297	89	1366	780	310	230
199.041	547167	218	470	79	5781	1863	64	1152	753	554	81	102	954	561	2051	328	511	173	1378	463	180	2483	77	1878	1647	3823	12425	555	409	46	479	62	338	7885	90	1120	101	368	6727	188	767	4332	20735	8752	690	9463	5429	2124	2432
202.08	1255270	492	1433	188	12217	4581	285	3620	1519	1340	205	196	2192	1386	4786	772	1117	383	3270	1292	455	6600	188	4755	3826	8817	28955	1308	973	118	1252	146	667	18252	158	2434	166	544	15340	975	2376	7776	57220	12803	1803	20511	13182	5589	5624
205.129	123671	49	56	20	1406	379	19	180	116	143	16	18	222	101	540	82	103	47	400	107	36	790	17	396	413	985	2498	157	47	8	122	14	98	1651	13	262	7	53	1340	2	150	982	4466	1028	197	2095	1205	566	572
208.124	252796	107	178	50	2676	1887	72	423	239	267	39	42	390	183	912	122	222	83	754	202	94	1494	46	911	661	1692	6985	332	263	50	256	29	177	3875	44	438	49	155	2646	278	1358	2102	9873	4075	344	3990	2514	1091	1190
211.089	361197	168	271	75	3147	2837	139	1024	324	368	69	57	550	275	1378	187	318	104	975	277	136	2347	69	1440	986	2535	11530	536	319	84	347	42	243	5951	68	600	71	225	3820	384	2250	3160	13891	6753	543	5463	3745	1739	1606
214.165	232535	82	148	48	2223	1899	73	525	144	204	36	27	342	182	759	115	180	69	630	178	88	1398	43	776	495	1393	6400	268	183	40	185	27	124	3211	26	356	29	114	1984	169	1234	1354	7838	2402	283	2801	2221	928	894
217.338	92372	36	61	14	912	436	20	98	65	56	12	7	50	45	202	26	51	15	156	47	20	361	10	200	144	305	1563	56	25	3	57	13	36	779	8	118	4	32	460	54	342	265	1659	662	57	372	492	238	226
220.372	64839	26	38	20	716	376	14	169	65	52	12	8	56	45	174	25	49	12	160	67	36	375	9	228	136	379	2049	50	20	14	40	7	30	832	6	119	5	30	486	96	506	310	2242	350	63	648	535	206	246
223.397	13539	7	0	9	78	97	0	69	0	0	1	2	13	0	20	0	13	4	42	9	13	0	3	74	34	103	283	0	0	3	18	3	10	215	2	14	0	0	45	0	99	129	522	32	31	112	58	44	0
226.463	11665	4	0	0	0	0	0	0	0	6	2	0	4	5	6	0	11	7	50	0	2	44	0	28	23	77	68	0	0	0	0	3	0	32	0	33	0	0	0	0	0	0	0	0	0	0	139	0	0
[truncated: 182 more columns]
